# Supplementary material for: Hypervirulent Listeria monocytogenes clones’ adaption to mammalian gut accounts for their association with dairy products
Source: PubMed Central journal article supplement (PMC6554400; doi:10.1038/s41467-019-10380-0), 2019-06-06
Supplement: 41467_2019_10380_MOESM1_ESM.pdf [file 41467_2019_10380_MOESM1_ESM.pdf]

1 **Supplementary Information**

2

3 Hypervirulent *Listeria monocytogenes* clones' adaption to mammalian gut accounts for their  
4 association with dairy products

5

6 Maury et al.

7

8

9 **Supplementary Figures**

10

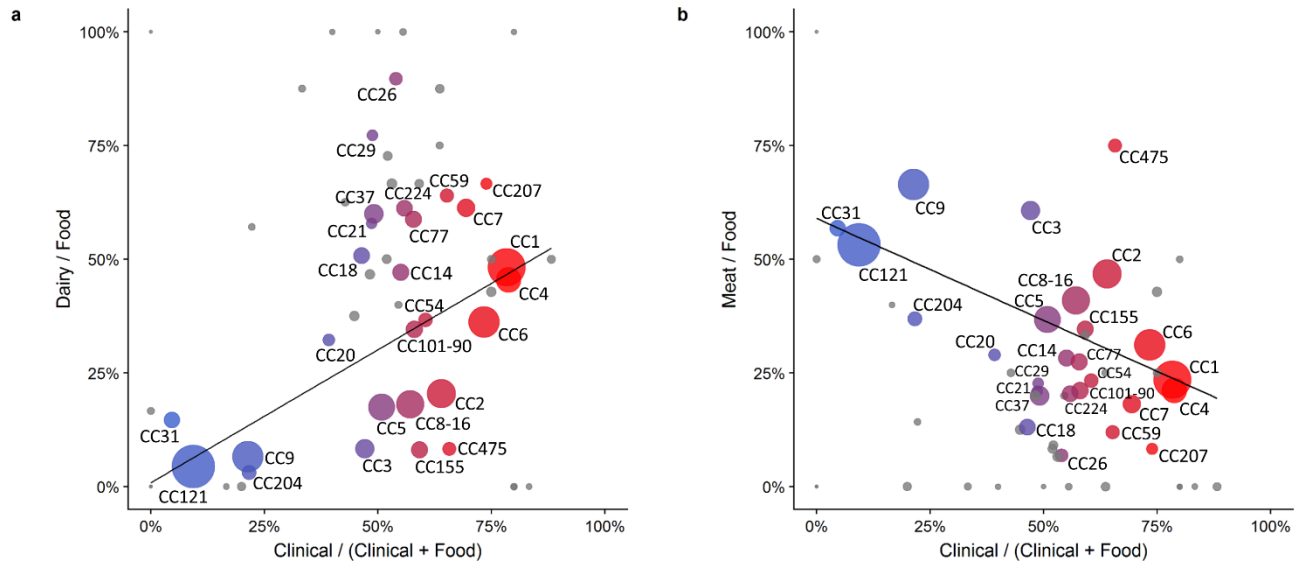

11

12

13 **Supplementary Figure 1: Relationship between clone frequency in dairy and meat products**  
14 **versus clinical frequency**

15 Frequency of clones in dairy products (a) and meat products (b) as a function of clinical frequency.  
16 Major CCs representing individually at least 0.5% of all the isolates of the study are shown with  
17 similar colors than in Fig. 1a and are indicated next to the corresponding dots. The other CCs,  
18 considered as minor, are represented in grey. Linear regressions of isolate frequency in dairy  
19 products (a;  $p < 1.10^{-7}$ ,  $R^2 = 0.425$ ) and in meat products (b;  $p < 1.10^{-7}$  and  $R^2 = 0.426$ ) against  
20 clinical frequency were weighted by number of isolates per CC.

21

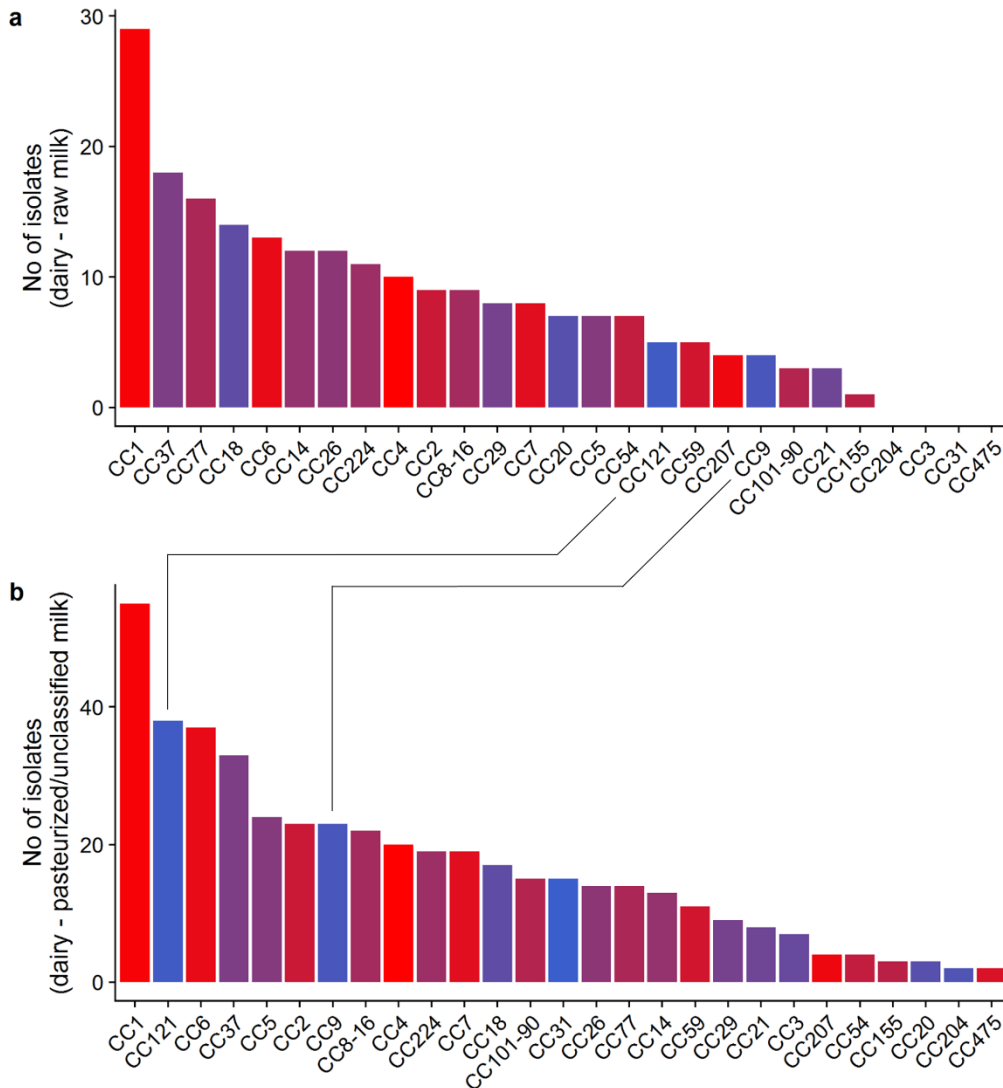

22

23 **Supplementary Figure 2: Number of isolates per clone in row and pasteurized milk-derived**

24 **products**

25 All isolates collected from dairy products are shown (n = 758). Major CCs representing

26 individually at least 0.5% of all the isolates of the study are shown with similar colors than in

27 Fig. 1a. **a** Number of isolates collected from raw milk-derived products. **b** Number of isolates

28 collected from dairy products made of pasteurized or unknown type of milk. Clones are ordered by

29 number of isolates of each type of dairy product. Isolates were considered to be isolated from dairy

30 products made of raw milk only if it was clearly indicated as such, if not, dairy products were

31 considered as made of pasteurized or unknown type of milk. Black lines between panels **a** and **b**

32 highlight a shift of CC9 and CC121 between the two types of dairy products.

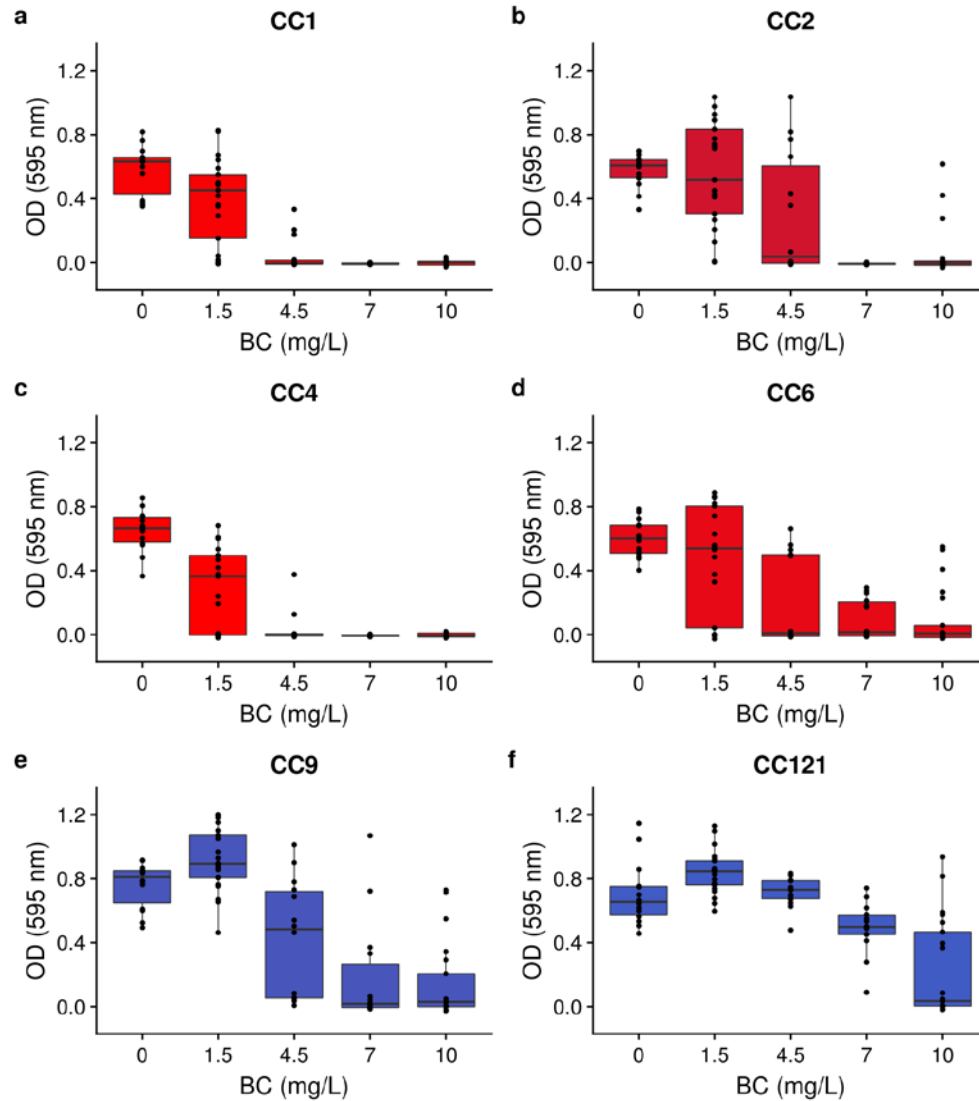

33  
 34 **Supplementary Figure 3: Effect of increasing BC concentrations on biofilm formation per**  
 35 **clone**

36 Biofilm formation capacity in absence or presence of 1.5, 4.5, 7 and 10 mg/L of benzalkonium  
 37 chloride (BC) at 37 °C is shown for 42 isolates representative of CC1, CC2, CC4, CC6, CC9 and  
 38 CC121 (seven isolates per CC). Biofilm quantification was performed after 48h of static growth in  
 39 modified MCDB 202 medium with or without BC using a violet crystal labeling-based method (see  
 40 Methods section) and is shown as OD<sub>595nm</sub>. Colors are as in Fig. 1a. In boxplots, the boxes delimit  
 41 the first (25%) and third (75%) quartiles while the bars delimit the second quartile (median).  
 42 Outliers are outside the whiskers. n = seven strains per clone tested three times independently for  
 43 each condition. BC: Benzalkonium chloride. Source data are provided as a Source Data file.

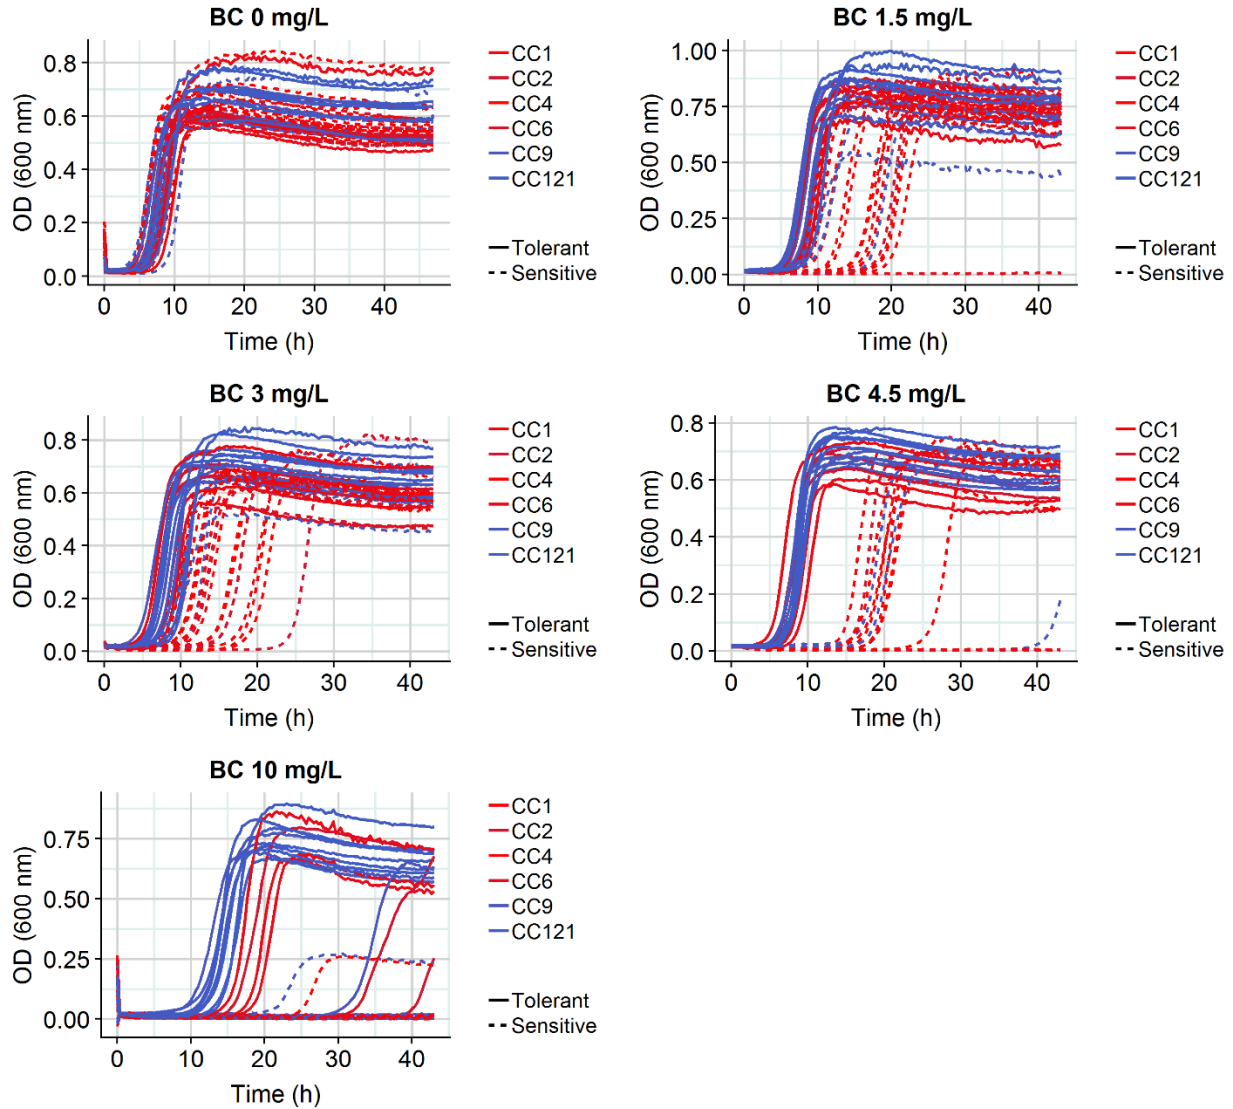

44

45 **Supplementary Figure 4: Effect of increasing BC concentrations on growth**

46 Growth in BHI broth at 37 °C in absence or presence of 1.5, 3, 4.5 or 10 mg/L of benzalkonium  
 47 chloride (BC) was assessed for 42 representative isolates of CC1, CC2, CC4, CC6, CC9 and CC121  
 48 (seven isolates per CC). Growth was evaluated by measuring the OD<sub>600nm</sub> every 15 min during  
 49 43 h. BC-tolerant (solid lines) and -sensitive (dashed lines) isolates are indicated. Colors are as in  
 50 Fig. 1a. BC: Benzalkonium chloride. Source data are provided as a Source Data file.

51

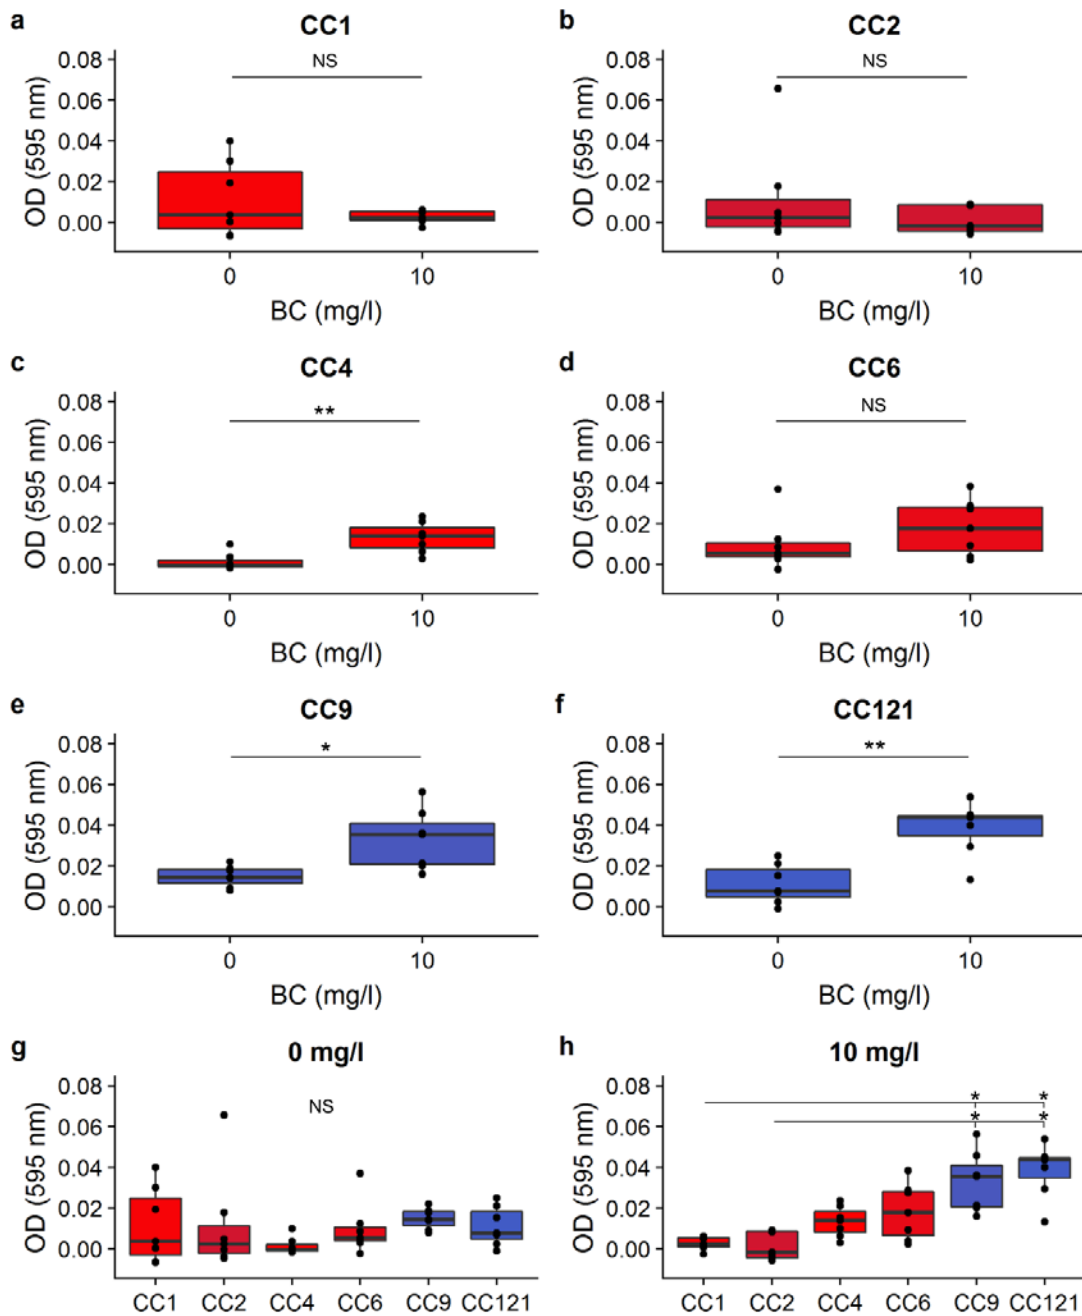

52

53 **Supplementary Figure 5: Effect of BC on biofilm formation at 4 °C**

54 Biofilm formation capacity in absence or presence of 10 mg/L of benzalkonium chloride (BC) at  
 55 4 °C is shown for 42 isolates representative of CC1, CC2, CC4, CC6, CC9 and CC121 (seven

56 isolates per CC). Biofilm quantification was performed after 48 h of static growth in modified  
57 MCDB 202 medium with or without BC using a violet crystal labeling-based method (see Methods  
58 section) and is shown as OD<sub>595nm</sub>. **a-f** Biofilm formation capacity in absence and presence of  
59 10 mg/L of BC per clone. **g, h** Comparison of biofilm formation capacities between clones in  
60 absence (**g**) and presence of 10 mg/L of BC (**h**). Colors are as in Fig. 1a. In boxplots, the boxes  
61 delimit the first (25%) and third (75%) quartiles while the bars delimit the second quartile (median).  
62 Outliers are outside the whiskers. Statistics were performed using the Mann-Whitney U test with  
63 holm's correction. \*\*:  $p < 0.01$ ; \*:  $p < 0.05$ . NS: Not significant. BC: Benzalkonium chloride.  
64 Source data are provided as a Source Data file.

65

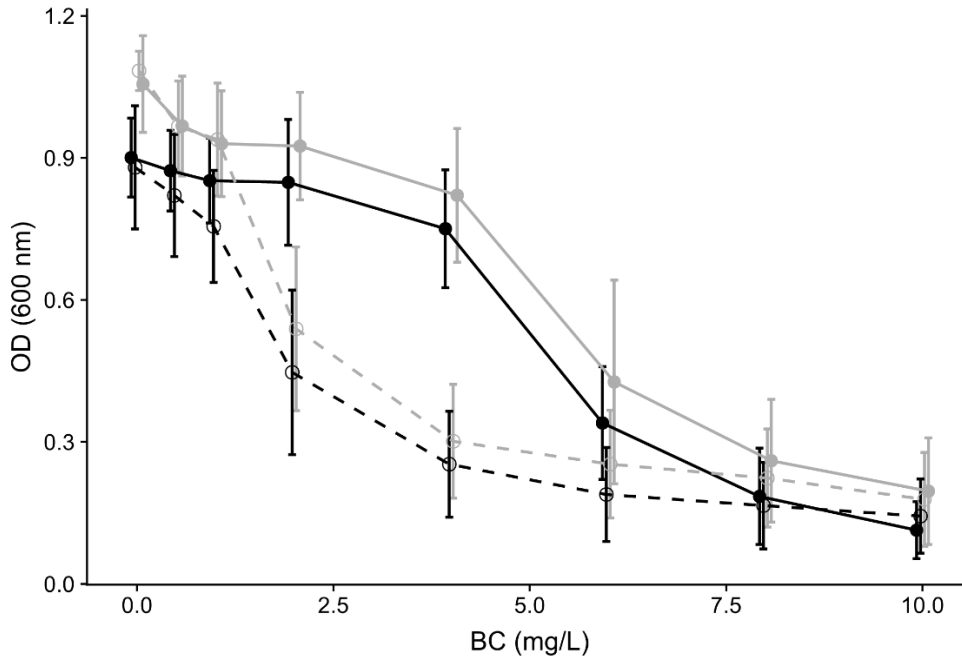

66

67 **Supplementary Figure 6: Effect of *qac* (Tn6188) and *bcrABC* gene cassette on BC tolerance**  
 68 **of CC9 and CC121**

69 In order to validate the role of *qac* and *bcrABC* in BC tolerance of CC9 and CC121 isolates, we  
 70 constructed the mutant strain CLIP 2016/00360Δ*qac* (CC121 strain where *qac* has been removed)  
 71 and the complemented strain CLIP 2009/00521+pPL2::*bcrABC* (CC9 strain where a pPL2 plasmid  
 72 harboring the *bcrABC* gene cassette under its native promoter has been inserted intra-  
 73 chromosomally). We then compared these strains with their corresponding WT strains by  
 74 measuring the OD<sub>600nm</sub> after 2 h of growth at 37 °C in BHI with various BC concentrations (from  
 75 0 to 10 mg/L). The graph shows the OD<sub>600nm</sub> for all tested BC concentrations. Error bars show the  
 76 standard error of the mean, taking into account three independent experiments. Black solid line:  
 77 CLIP 2009/00521+pPL2::*bcrABC*, black dashed line: CLIP 2009/00521WT, grey dashed line:  
 78 CLIP 2016/00360Δ*qac*, grey solid line: CLIP 2016/00360WT. (i.e. grey: CLIP 2016/00360-  
 79 deriving strains; black: CLIP 2009/00521-deriving strains; dashed lines: strains with no BC  
 80 tolerance gene; solid lines: strains with either *qac* or *bcrABC*). BC: Benzalkonium chloride. Source  
 81 data are provided as a Source Data file.

82



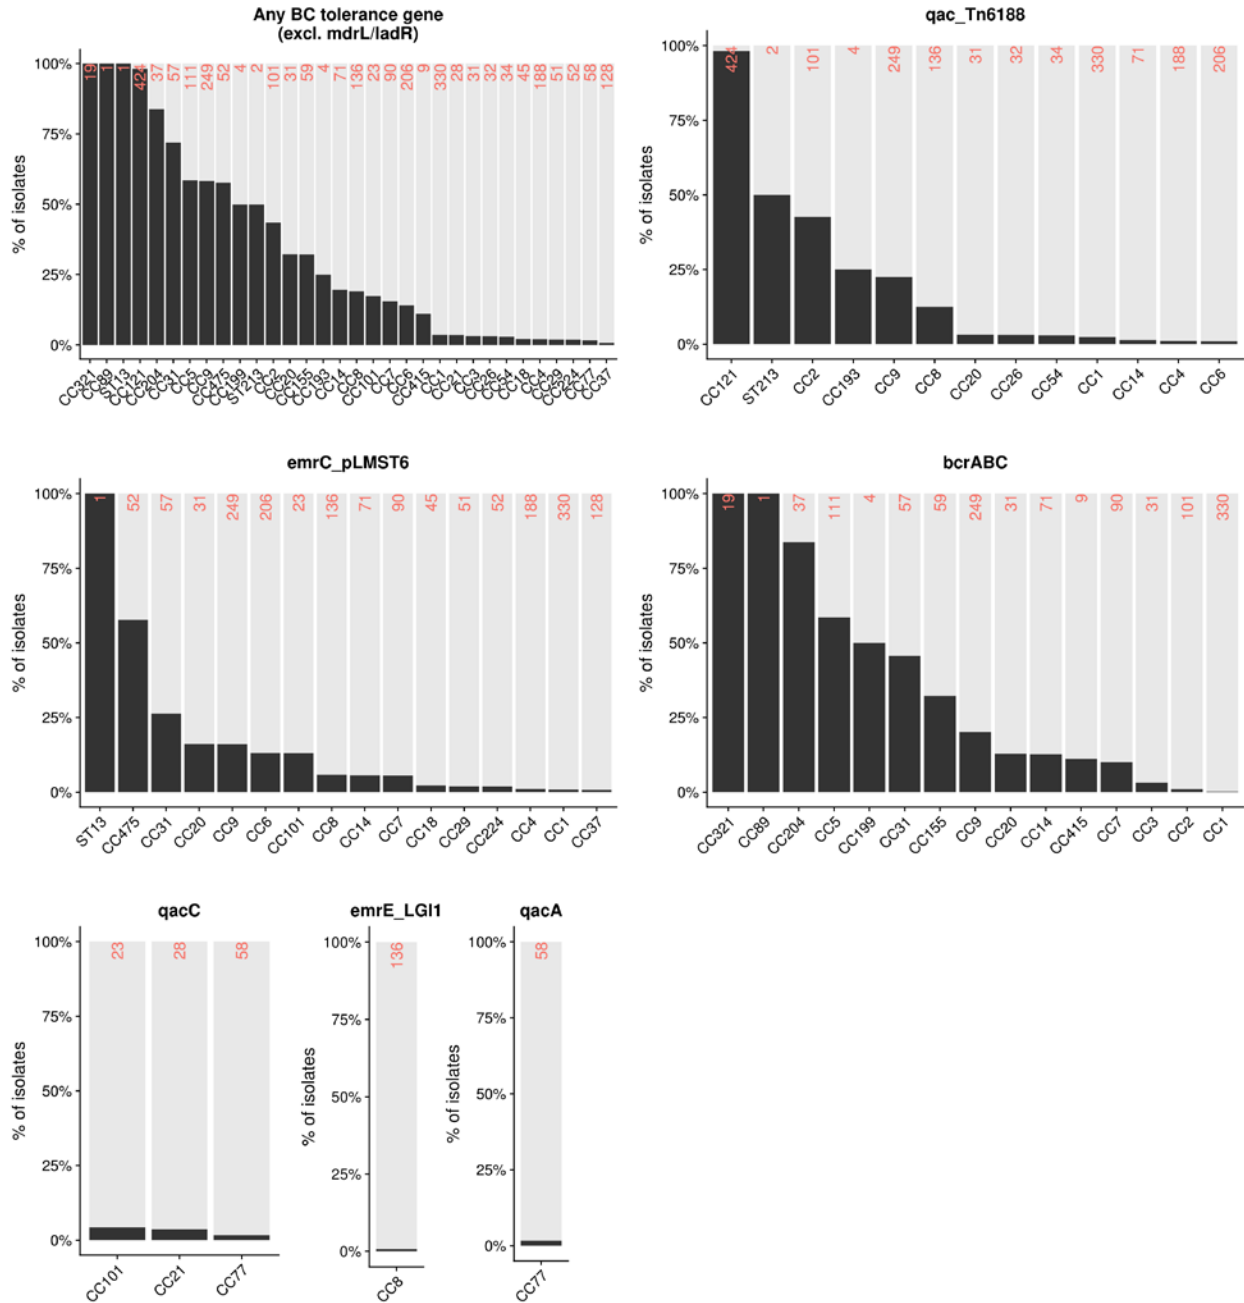

83

84 **Supplementary Figure 7: Prevalence of BC tolerance genes in *Lm* clones**

85 We analyzed a set of 2,928 genome sequences of non-redundant *Lm* isolates collected from 2015  
 86 to 2018 in the context of the French surveillance of listeriosis. Percentages of isolates harboring  
 87 BC-tolerance genes (i.e. *qac*, *bcrABC*, *emrC*, *qacC*, *emrE* and *qacA*) per clone are shown. The  
 88 graphic on the top-left shows the number of isolates harboring at least one BC tolerance gene cited

89 above. *malR* and *ladR* were found in almost all isolates, as they are part of the *Lm* core genome<sup>15,10</sup>.  
90 Black: gene present. Grey: gene absent. Total numbers of isolates per clone are indicated on top of  
91 each bar. Only clones with at least one isolate harboring the considered BC-tolerance gene are  
92 shown in each plot. *bcrABC* was considered present only if all genes of the cassette were present.  
93

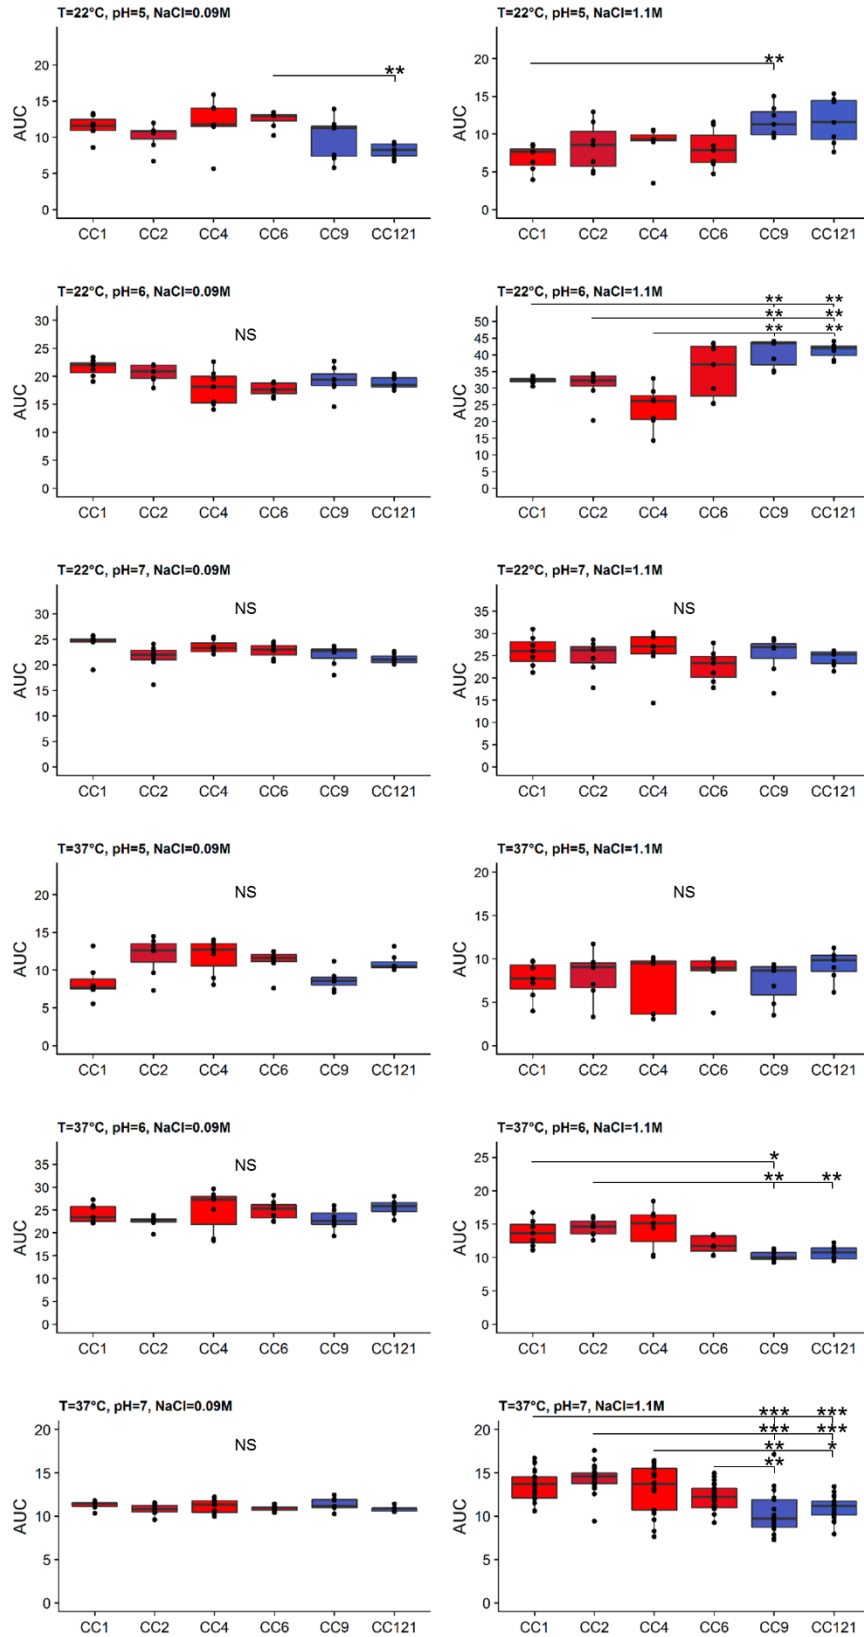

95 **Supplementary Figure 8: Effect of temperature, pH and salt on growth of *Lm* clones**

96 Growth in BHI broth at 22 and 37 °C, pH 5, 6 and 7, in presence of 0.09 M or 1.1 M of NaCl is  
97 shown for 42 representative isolates of CC1, CC2, CC4, CC6, CC9 and CC121 (seven isolates per  
98 CC). Growth was evaluated by measuring the OD<sub>600nm</sub> every 15 min during a minimum of 14 h.  
99 Areas under the growth curves shown in Supplementary Fig. 11 are shown per CC. Colors are as  
100 in Fig. 1a. In boxplots, the boxes delimit the first (25%) and third (75%) quartiles while the bars  
101 delimit the second quartile (median). Outliers are outside the whiskers. Statistics were performed  
102 using the Mann-Whitney U test with holm's correction. \*\*\*:  $p < 10^{-3}$ ; \*\*:  $p < 10^{-2}$ ; \*:  $p < 0.05$ .  
103 NS: Not significant. n = seven strains per clone tested three times independently. AUC: Area under  
104 the curve. Source data are provided as a Source Data file.

105

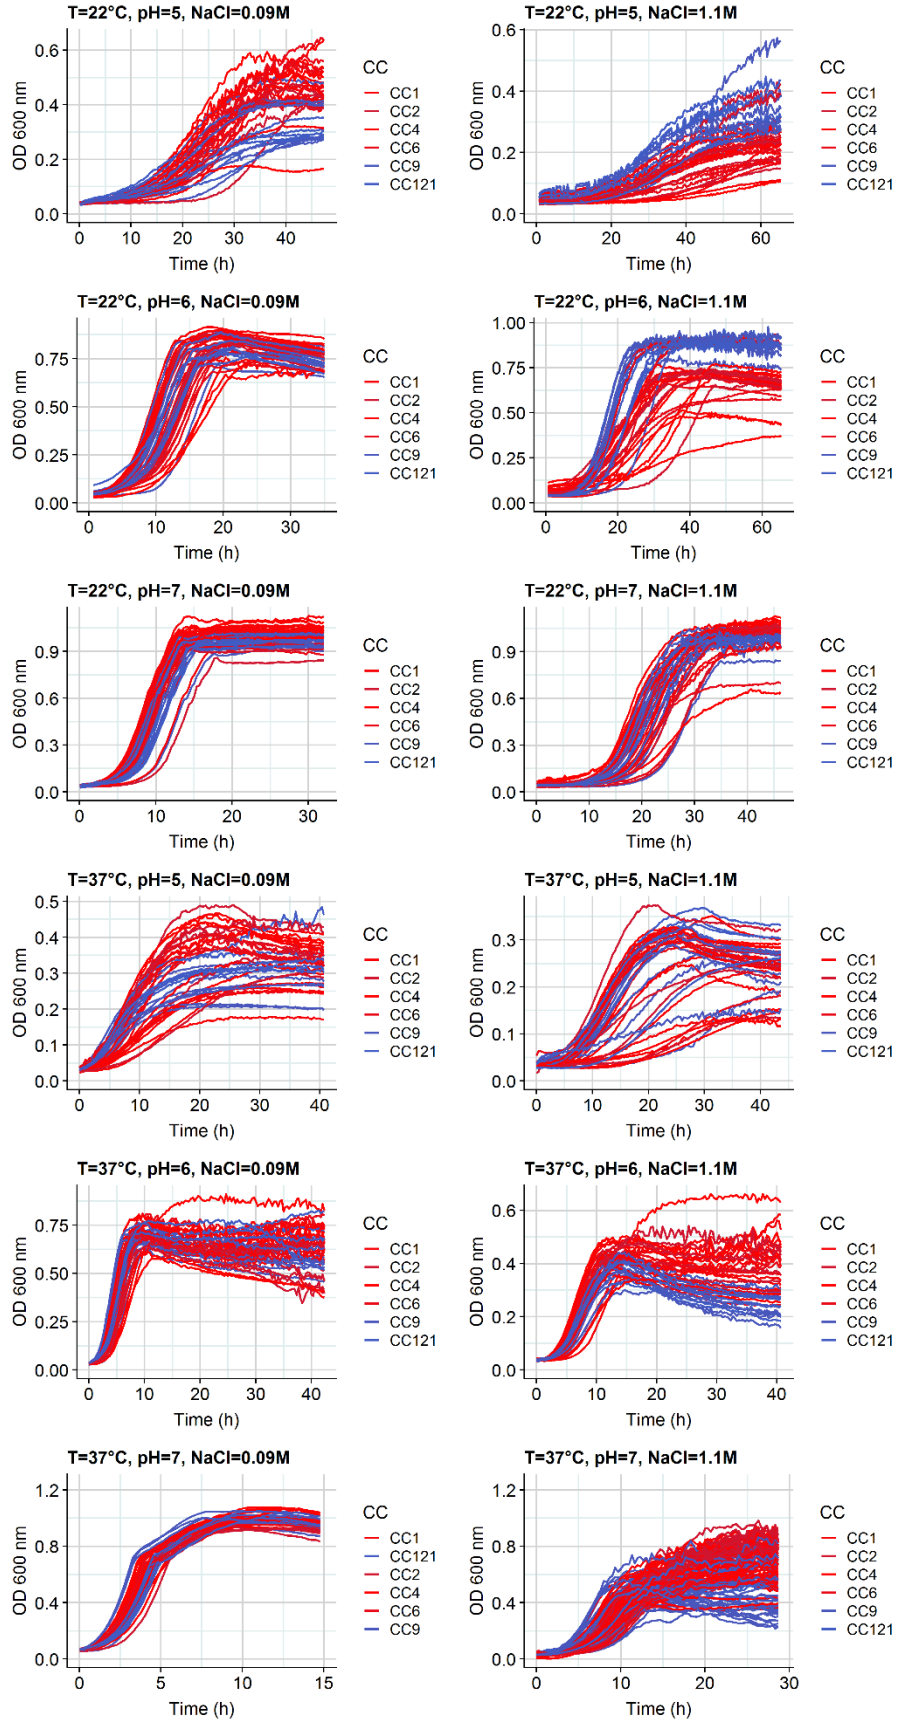

107 **Supplementary Figure 9: Effect of temperature, pH and salt on growth of *Lm* clones**

108 Growth in BHI broth at 22 and 37 °C, pH 5, 6 and 7, in presence of 0.09 M or 1.1 M of NaCl is  
109 shown for 42 representative isolates of CC1, CC2, CC4, CC6, CC9 and CC121 (seven isolates per  
110 CC). Growth was evaluated by measuring the OD<sub>600nm</sub> every 15 min during the indicated amount  
111 of time. Colors are as in Fig. 1a. Source data are provided as a Source Data file.

112

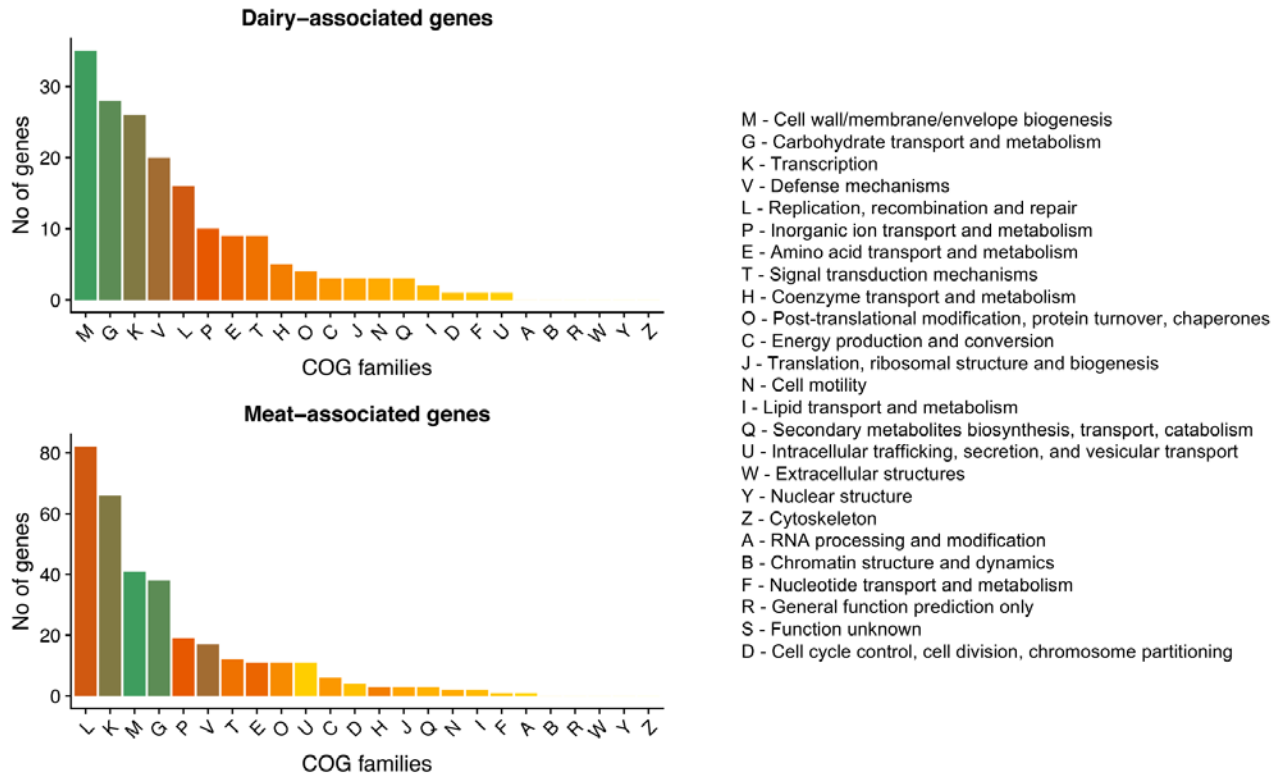

113

114 **Supplementary Figure 10: Classification of genes associated with dairy and meat origins into**

115 **clusters of orthologous groups**

116 A genome wide association study was performed in order to identify genes significantly associated

117 with dairy or meat origins among a set of 21,546 gene families of a pangenome built from 1,129

118 genomes. We obtained 455 and 916 gene families significantly associated with dairy and meat

119 origins, respectively. The graphs show the classification of each of these genes into clusters of

120 orthologous groups (COG). COG families are ordered per number of genes in each graph. Color

121 gradient is set according to the order of the COG families in dairy-associated genes. Identical colors

122 are used for each COG family in the graph of meat-associated genes. Top-left: COG families of

123 dairy-associated genes. Bottom-left: COG families of meat-associated genes. Right: group of

124 functions of each COG families.
